# Supplementary material
Source: PubMed Central journal article supplement (PMC2665056)

## Supplemental Materials

Supplemental Figure S1. MS spectra of the product eluted at 7.4 min and 3 $\alpha$ -Diol-17-G (eluted at 12.6 min) in the reduction of DhtG catalyzed by AKR1C enzymes.

Supplemental Figure S2. MS spectra of 3 $\beta$ -Diol-17-S (eluted at 13.8 min) and the product eluted at 18.0 min in the reduction of DhtS catalyzed by AKR1C enzymes.

Supplemental Figure S3. Representative kinetic data for the reduction of steroids and their conjugates catalyzed by AKR1C enzymes. A, Reduction of Dht catalyzed by AKR1C1. B, Reduction of DhtG catalyzed by AKR1C1. C, Reduction of DhtS catalyzed by AKR1C1. Initial velocities of reactions were measured fluorimetrically at 25 °C and data were analyzed as described under Experimental Procedures. Data represent mean values of incubations performed in duplicate or triplicate. Nonlinear fitting analysis of the data using the program GraFit yielded the curves and estimates of  $V_{\max}$ ,  $K_m$ , and associated S.E. values.

Figure S1

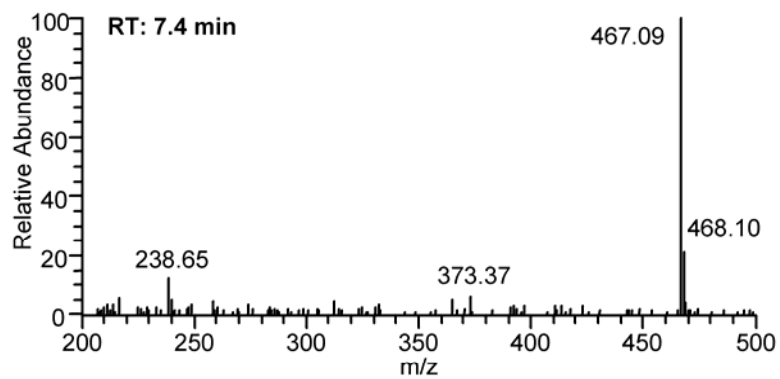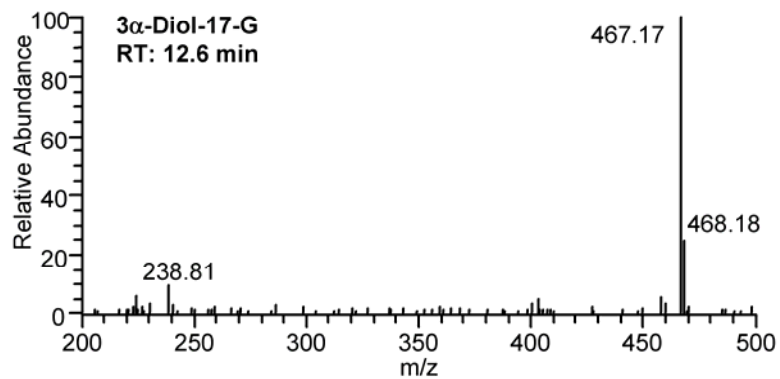

Figure S2.

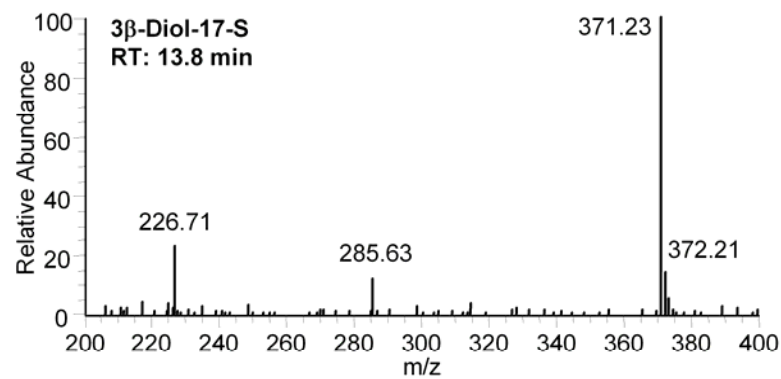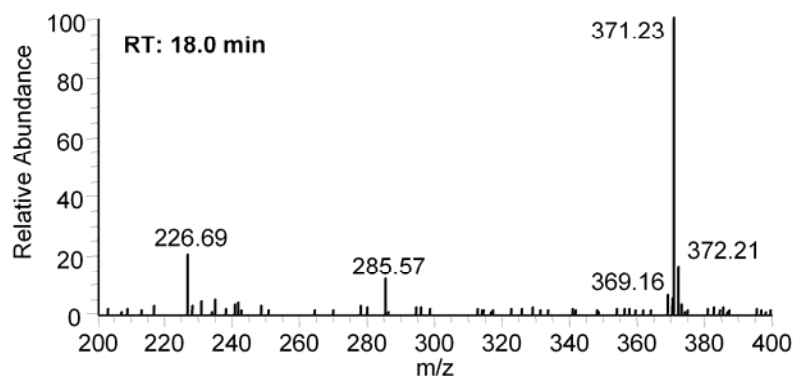

Figure S3.

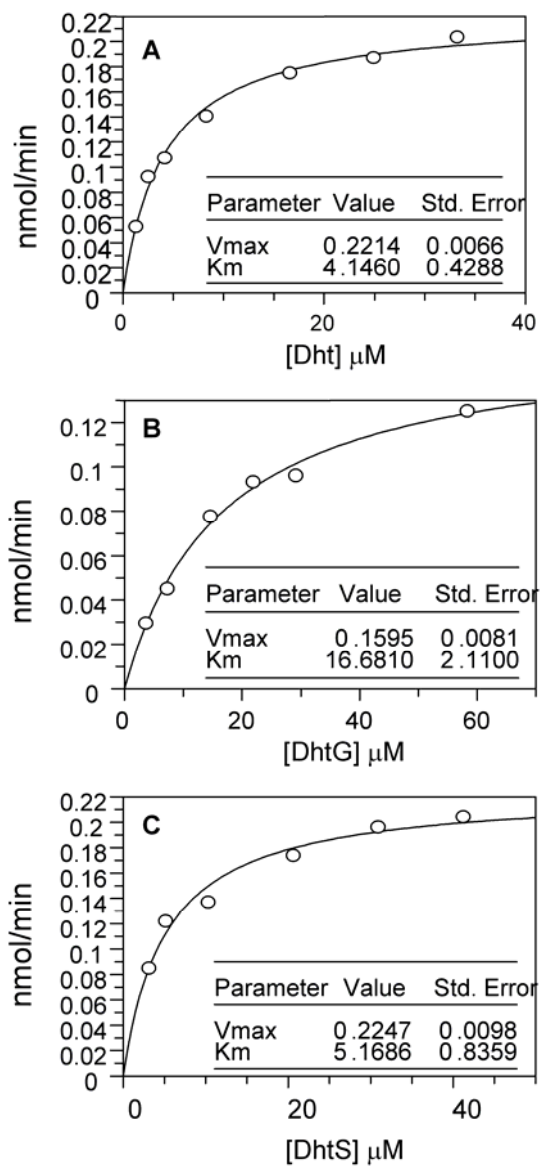

Supplement: M809465200_1.pdf [file M809465200_1.pdf]
